# Supplementary material for: Tree Species Richness Promotes Invertebrate Herbivory on Congeneric Native and Exotic Tree Saplings in a Young Diversity Experiment
Source: PubMed Central journal article supplement (PMC5161486; doi:10.1371/journal.pone.0168751), 2016-12-16
Supplement: pone.0168751.s001.pdf [file pone.0168751.s001.pdf]

### Block 1 = Block D

### Block 2 = Block C

### Block 4 = Block A

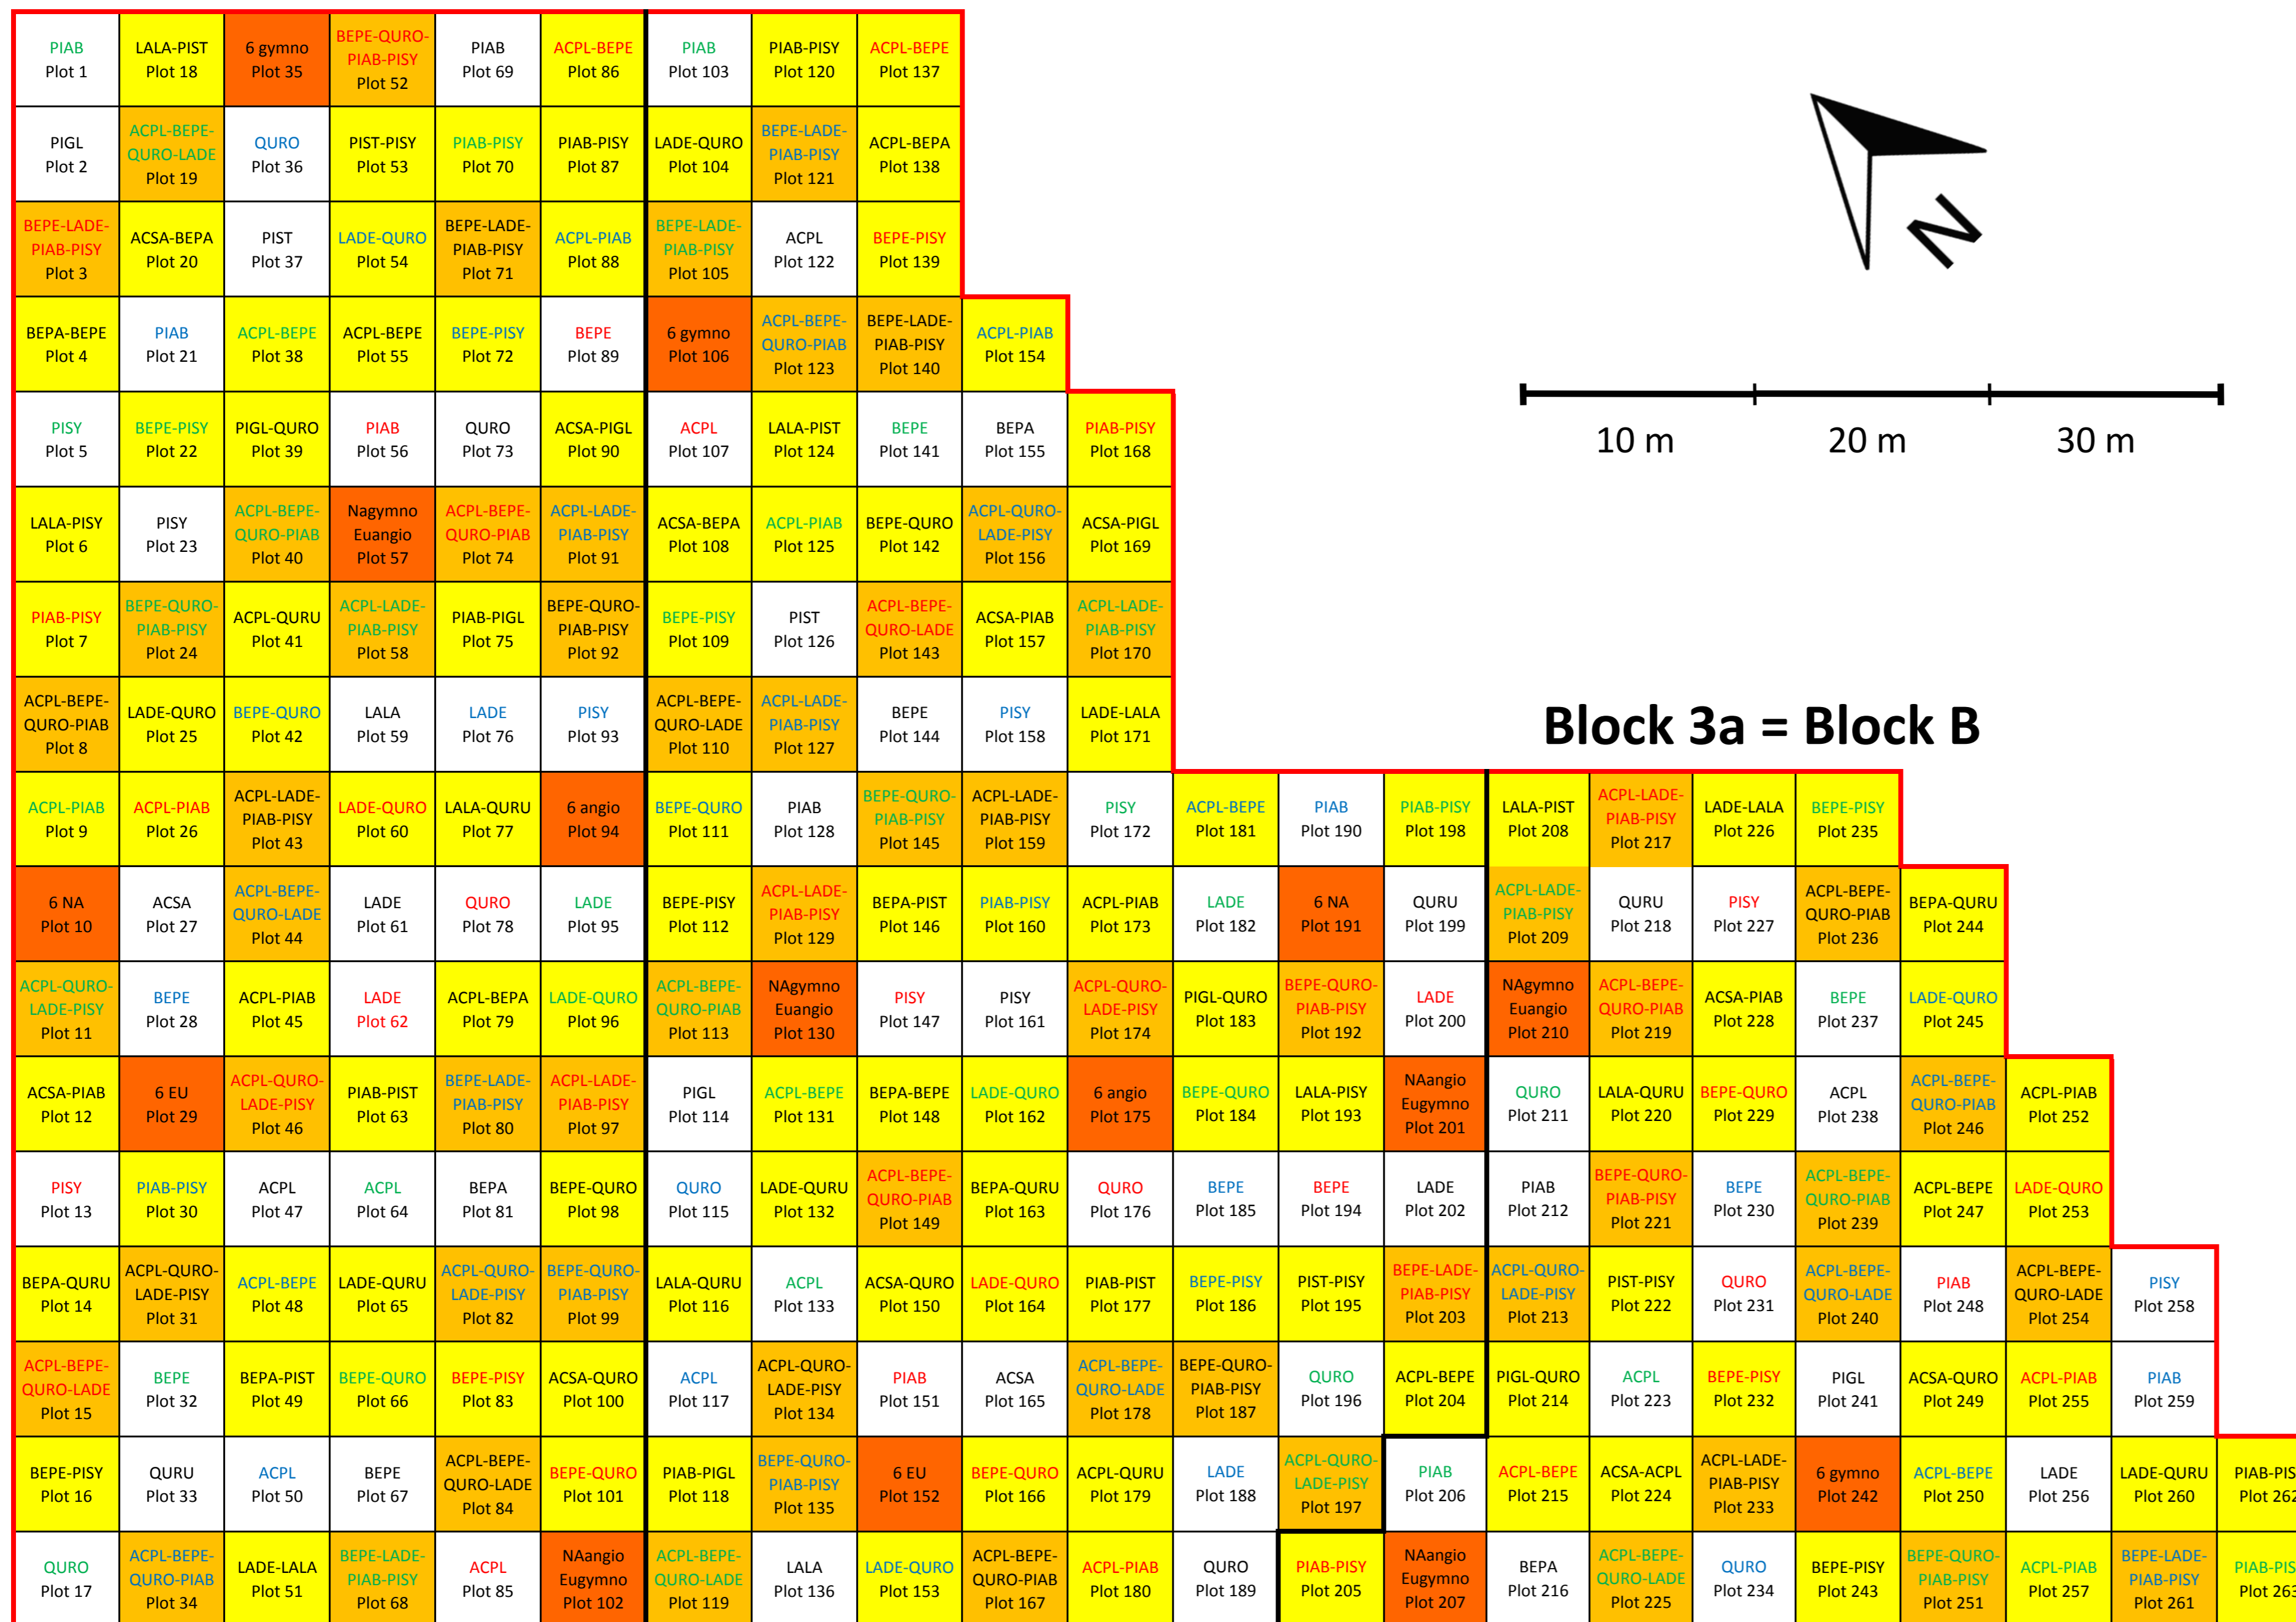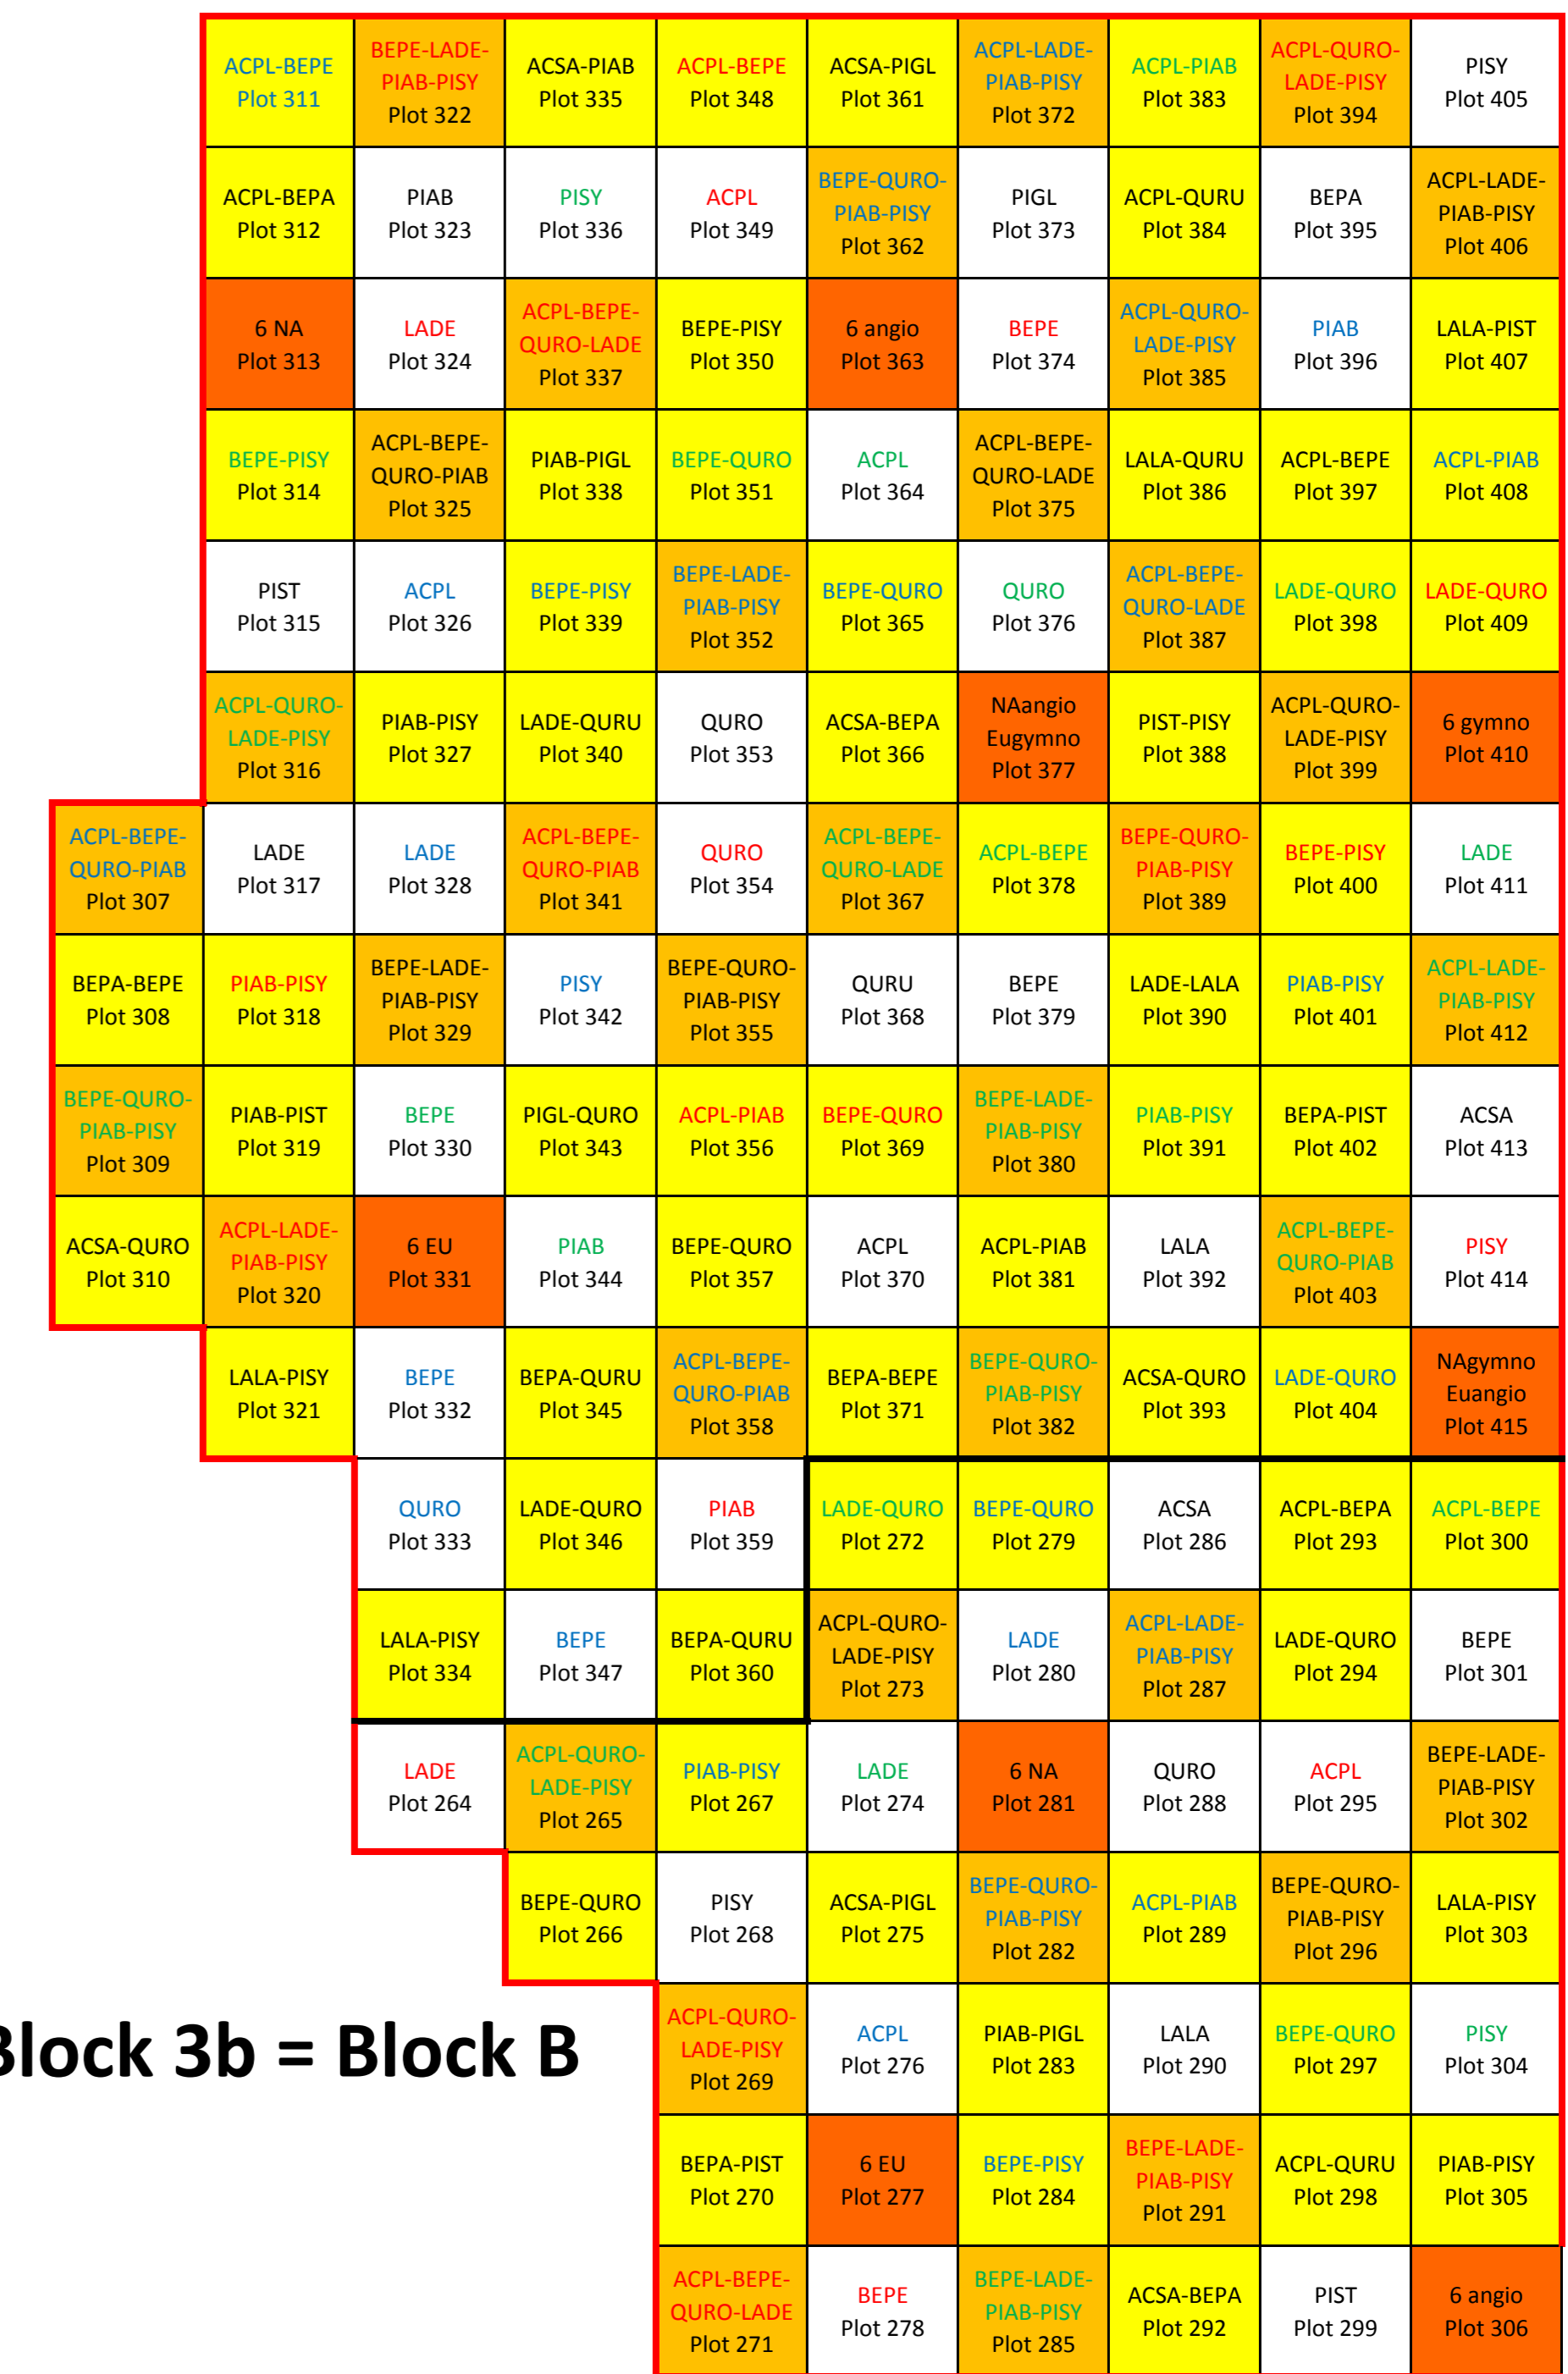

### Fertilization

Black lettering = non fertilized plots  
 Blue lettering = N fertilized plots  
 Green lettering = P fertilized plots  
 Red lettering = N+P fertilized plots

### Species richness

Monoculture  
 2-species mixture  
 4-species mixture  
 6-species mixture

### Tree species

European (EU) angiosperm :  
 European (EU) gymnosperm:  
 North American (NA) angiosperm:  
 North American (NA) gymnosperm:

ACPL = *Acer platanoides*  
 LADE = *Larix decidua*  
 ACSA = *Acer saccharum*  
 LALA = *Larix laricina*

BEPE = *Betula pendula*  
 PIAB = *Picea abies*  
 BEPA = *Betula papyrifera*  
 PIGL = *Picea glauca*

QURO = *Quercus robur*  
 PISY = *Pinus sylvestris*  
 QURU = *Quercus rubra*  
 PIST = *Pinus strobus*

Figure S1 Schematic map illustrating the design of Freiburg IDENT. The experiment is located at 48°01'10"N / 7°49'37"E. Please see the legend for further explanations.
